# Supplementary material for: The Evolution and Ecology of Oxidative and Antioxidant Status: A Comparative Approach in African Mole-Rats
Source: Antioxidants (Basel). 2023 Jul 25;12(8):1486. doi: 10.3390/antiox12081486 (PMC10451868; doi:10.3390/antiox12081486)
Supplement: Supplementary file 1 [file antioxidants-12-01486-s001.zip › Supplementary S2 05062023.xlsx]

## Sheet: Sheet1
Species	Status (Wild-caught/Captive)	Body Mass (BM)	ERMR	TOS	TAC	OSI	Aridity	Aridity Index (AI)	MLSP
CHP	Captive	101	73.0153	8.33753	2.00611	4.15606	Semi-Arid	0.48	11
CHP	Captive	146	105.547	6.92695	1.42262	4.86916	Semi-Arid	0.48	11
CHP	Captive	89	64.3403	8.76574	1.04751	8.36815	Semi-Arid	0.48	11
CHP	Captive	166	120.005	7.70781	1.01278	7.61054	Semi-Arid	0.48	11
CHP	Captive	179	129.403	7.30479	0.929425	7.85947	Semi-Arid	0.48	11
CHP	Captive	88	63.6173	7.12846	0.721034	9.88645	Semi-Arid	0.48	11
CHP	Captive	105	75.907	7.5063	0.769658	9.75277	Semi-Arid	0.48	11
CHP	Captive	138	99.7635	7.65743	2.13115	3.5931	Semi-Arid	0.48	11
CHP	Captive	137	99.0406	8.31234	1.4643	5.67668	Semi-Arid	0.48	11
CHP	Captive	181	130.849	7.75819	1.00583	7.71318	Semi-Arid	0.48	11
CHP	Captive	124	89.6426	7.80856	1.56154	5.00054	Semi-Arid	0.48	11
CHP	Captive	125	90.3655	9.37028	1.20728	7.76148	Semi-Arid	0.48	11
CHP	Captive	169	122.174	7.10327	0.762712	9.31318	Semi-Arid	0.48	11
CHP	Captive	156	112.776	8.53904	1.20033	7.11389	Semi-Arid	0.48	11
CHP	Captive	87	62.8944	9.37028	1.42262	6.58665	Semi-Arid	0.48	11
CHP	Captive	163	117.837	6.54912	2.31175	2.83297	Semi-Arid	0.48	11
CHP	Captive	102	73.7383	6.67506	1.40872	4.73837	Semi-Arid	0.48	11
CHP	Captive	147	106.27	7.20403	1.28369	5.61197	Semi-Arid	0.48	11
CHH	Captive	63	57.96	10.4282	1.32837	7.85037	Semi-Arid	0.2	11
CHH	Captive	49	45.08	9.49622	1.26504	7.50665	Semi-Arid	0.2	11
CHH	Captive	95	87.4	10.6801	1.19379	8.94635	Semi-Arid	0.2	11
CHH	Captive	59	54.28	10.1511	2.23876	4.53427	Semi-Arid	0.2	11
CHH	Captive	62	57.04	13.1486	1.36795	9.61188	Semi-Arid	0.2	11
CHH	Captive	49	45.08	6.32242	0.948385	6.66651	Semi-Arid	0.2	11
CHH	Captive	52	47.84	6.5995	1.24129	5.31663	Semi-Arid	0.2	11
CHH	Captive	51	46.92	7.65743	1.41545	5.40988	Semi-Arid	0.2	11
CHH	Captive	70	64.4	8.94207	1.55795	5.73964	Semi-Arid	0.2	11
CHH	Captive	77	70.84	7.22922	1.55003	4.66392	Semi-Arid	0.2	11
CHH	Captive	126	115.92	7.98489	1.52628	5.23159	Semi-Arid	0.2	11
CHH	Captive	50	46	8.01008	1.20963	6.62194	Semi-Arid	0.2	11
CHH	Captive	57	52.44	8.23678	1.34421	6.12762	Semi-Arid	0.2	11
CHH	Captive	92	84.64	7.5063	1.01963	7.36177	Semi-Arid	0.2	11
CHH	Captive	73	67.16	8.53904	1.70044	5.02166	Semi-Arid	0.2	11
CHH	Captive	69	63.48	7.60705	1.73211	4.39179	Semi-Arid	0.2	11
CHH	Captive	63	57.96	9.57179	1.80336	5.30776	Semi-Arid	0.2	11
DMR	Captive	109	94.8091	3.4131	1.12351	3.0379	Arid	0.1	15.5
DMR	Captive	137	119.164	3.59698	1.47958	2.43108	Arid	0.1	15.5
DMR	Captive	106	92.1997	6.11587	1.56424	3.90979	Arid	0.1	15.5
DMR	Captive	88	76.5432	4.79345	1.34213	3.57152	Arid	0.1	15.5
DMR	Captive	134	116.554	3.56927	1.54034	2.3172	Arid	0.1	15.5
DMR	Captive	150	130.471	2.74559	1.4004	1.96058	Arid	0.1	15.5
DMR	Captive	121	105.247	8.63476	1.45169	5.94806	Arid	0.1	15.5
DMR	Captive	120	104.377	7.47355	1.64392	4.54617	Arid	0.1	15.5
DMR	Captive	108	93.9393	10.3526	1.57918	6.5557	Arid	0.1	15.5
DMR	Captive	146	126.992	7.39295	1.67032	4.42607	Arid	0.1	15.5
DMR	Captive	155	134.82	6.74055	1.61853	4.16463	Arid	0.1	15.5
DMR	Captive	116	100.898	3.50126	0.664688	5.26752	Arid	0.1	15.5
DMR	Captive	126	109.596	2.83627	0.836955	3.3888	Arid	0.1	15.5
DMR	Captive	160	139.169	2.76322	1.14651	2.41012	Arid	0.1	15.5
DMR	Captive	197	116.554	6.13098	0.966819	6.3414	Arid	0.1	15.5
NMR	Captive	134	59.51	6.02519	1.31559	4.57982	Arid	0.1	31
NMR	Captive	59.51	43.11	21.7053	2.32005	9.35554	Arid	0.08	31
NMR	Captive	43.11	57.64	14.1385	2.02481	6.98266	Arid	0.08	31
NMR	Captive	57.64	43.4	12.6851	1.39033	9.12382	Arid	0.08	31
NMR	Captive	43.4	57.64	10.7456	1.68875	6.36304	Arid	0.08	31
NMR	Captive	57.64	54.6	5.57431	1.28856	4.32599	Arid	0.08	31
NMR	Captive	54.6	47.5	11.2997	2.41652	4.67605	Arid	0.08	31
NMR	Captive	47.5	54.22	13.8413	3.37114	4.10582	Arid	0.08	31
NMR	Captive	54.22	40.61	3.92191	0.952507	4.11746	Arid	0.08	31
NMR	Captive	40.61	30.36	12.6423	2.0953	6.03364	Arid	0.08	31
NMR	Captive	30.36	38.1	15.7028	1.64635	9.53794	Arid	0.08	31
NMR	Captive	38.1	42.8	15.5819	1.71207	9.10116	Arid	0.08	31
NMR	Captive	42.8	34.31	13.2065	1.83823	7.18439	Arid	0.08	31
NMR	Captive	34.31	34.7	16.927	1.6755	10.1026	Arid	0.08	31
GC	Captive	34.7	123.9	1.3602	0.451613	3.01187	Dry Sub-Humid	0.51	11.2
GC	Captive	219	129.21	3.50126	0.931733	3.75779	Dry Sub-Humid	0.51	11.2
GC	Captive	245	144.55	3.6272	0.916729	3.95668	Dry Sub-Humid	0.51	11.2
GC	Captive	220	129.8	2.09068	0.226557	9.22807	Dry Sub-Humid	0.51	11.2
GC	Captive	182	107.38	4.03023	0.511628	7.87726	Dry Sub-Humid	0.51	11.2
GC	Captive	235	138.65	1.76322	0.856714	2.05812	Dry Sub-Humid	0.51	11.2
GC	Captive	245	144.55	4.73552	0.451613	10.4858	Dry Sub-Humid	0.51	11.2
GC	Captive	182	107.38	5.06297	0.871718	5.80804	Dry Sub-Humid	0.51	11.2
GC	Captive	145	85.55	7.55668	0.751688	10.0529	Dry Sub-Humid	0.51	11.2
BS	Captive	958	450.26	1.88917	0.594149	3.17962	Dry Sub-Humid	0.51	6
BS	Captive	926	435.22	1.78841	0.586647	3.04854	Dry Sub-Humid	0.51	6
BS	Captive	1050	493.5	1.41058	0.789197	1.78736	Dry Sub-Humid	0.51	6
BS	Captive	1050	493.5	0.251889	0.616654	0.408477	Dry Sub-Humid	0.51	6
BS	Captive	590	277.3	0.629723	0.736684	0.854807	Dry Sub-Humid	0.51	6
BS	Captive	736	345.92	4.33249	0.954239	4.54026	Dry Sub-Humid	0.51	6
BS	Captive	560	263.2	1.71285	0.991748	1.7271	Dry Sub-Humid	0.51	6
CHP	Wild-caught	83	68.0968	6.95214	1.94757	3.56965	Semi-Arid	0.48	11
CHP	Wild-caught	138	113.221	9.21914	2.17309	4.24241	Semi-Arid	0.48	11
CHP	Wild-caught	123	100.914	8.4131	2.39229	3.51675	Semi-Arid	0.48	11
CHP	Wild-caught	95	77.9421	3.37531	2.01958	1.67129	Semi-Arid	0.48	11
CHP	Wild-caught	173	141.937	5.6927	2.19204	2.59698	Semi-Arid	0.48	11
CHP	Wild-caught	113	92.7101	4.28212	2.21857	1.93012	Semi-Arid	0.48	11
CHP	Wild-caught	101	82.8647	8.03526	1.89387	4.24277	Semi-Arid	0.48	11
CHP	Wild-caught	100	82.0443	4.28212	1.75995	2.43309	Semi-Arid	0.48	11
CHP	Wild-caught	95	77.9421	2.97229	1.93683	1.53462	Semi-Arid	0.48	11
CHP	Wild-caught	111	91.0692	6.70025	1.86418	3.5942	Semi-Arid	0.48	11
CHP	Wild-caught	81	66.4559	2.01511	1.27985	1.57449	Semi-Arid	0.48	11
CHP	Wild-caught	117	95.9918	1.78841	1.36008	1.31494	Semi-Arid	0.48	11
CHP	Wild-caught	140	114.862	3.50126	1.55338	2.25396	Semi-Arid	0.48	11
CHP	Wild-caught	98	80.4034	3.07305	2.16298	1.42075	Semi-Arid	0.48	11
CHP	Wild-caught	145	118.964	4.40806	1.63298	2.6994	Semi-Arid	0.48	11
CHP	Wild-caught	120	98.4532	2.77078	1.68225	1.64707	Semi-Arid	0.48	11
CHH	Wild-caught	43	56.9023	12.5189	2.37334	5.2748	Semi-Arid	0.2	11
CHH	Wild-caught	80	105.865	13.1738	1.67669	7.85701	Semi-Arid	0.2	11
CHH	Wild-caught	39	51.6091	7.65743	1.93794	3.95133	Semi-Arid	0.2	11
CHH	Wild-caught	47	62.1955	8.74055	1.70044	5.14016	Semi-Arid	0.2	11
CHH	Wild-caught	24	31.7594	10.0252	2.0171	4.9701	Semi-Arid	0.2	11
CHH	Wild-caught	29	38.376	8.96725	1.97752	4.5346	Semi-Arid	0.2	11
CHH	Wild-caught	50	66.1654	6.85139	2.04085	3.35713	Semi-Arid	0.2	11
CHH	Wild-caught	47	62.1955	9.79849	2.18334	4.48784	Semi-Arid	0.2	11
CHH	Wild-caught	75	99.2482	7.17884	2.13585	3.36112	Semi-Arid	0.2	11
CHH	Wild-caught	60	79.3985	8.38791	2.02502	4.14215	Semi-Arid	0.2	11
CHH	Wild-caught	31	41.0226	12.1914	1.80336	6.76041	Semi-Arid	0.2	11
CHH	Wild-caught	76	100.571	6.87657	2.20709	3.11567	Semi-Arid	0.2	11
CHH	Wild-caught	66	87.3384	6.80101	1.77169	3.83871	Semi-Arid	0.2	11
CHH	Wild-caught	55	72.782	6.92695	2.07251	3.34229	Semi-Arid	0.2	11
CHH	Wild-caught	54	71.4587	7.0529	2.3575	2.99168	Semi-Arid	0.2	11
CHH	Wild-caught	59	78.0752	6.47355	1.95377	3.31337	Semi-Arid	0.2	11
CHH	Wild-caught	63	83.3685	7.20403	2.41292	2.98561	Semi-Arid	0.2	11
CHH	Wild-caught	60	79.3985	4.98741	1.89044	2.63823	Semi-Arid	0.2	11
CHH	Wild-caught	54	71.4587	10.9068	1.89044	5.76946	Semi-Arid	0.2	11
CHN	Wild-caught	139	109.415	4.40806	0.92167	4.78269	Hyper mesic	1.34	N/A
CHN	Wild-caught	136	107.054	5.64232	1.70989	3.29982	Hyper mesic	1.34	N/A
CHN	Wild-caught	132	103.905	7.22922	1.66163	4.35068	Hyper mesic	1.34	N/A
CHN	Wild-caught	136	107.054	6.47355	1.49169	4.33974	Hyper mesic	1.34	N/A
CHN	Wild-caught	160	125.946	5.01259	1.34273	3.73313	Hyper mesic	1.34	N/A
CHN	Wild-caught	145	114.138	3.42569	0.809836	4.23011	Hyper mesic	1.34	N/A
CHN	Wild-caught	129	101.544	5.08816	0.66717	7.62648	Hyper mesic	1.34	N/A
CHN	Wild-caught	159	125.158	2.59446	0.658662	3.93898	Hyper mesic	1.34	N/A
CHN	Wild-caught	129	101.544	3.29975	1.61338	2.04524	Hyper mesic	1.34	N/A
CHN	Wild-caught	67	52.7397	1.76322	1.55253	1.13571	Hyper mesic	1.34	N/A
CHN	Wild-caught	68	53.5269	1.86398	1.04062	1.79122	Hyper mesic	1.34	N/A
CHN	Wild-caught	89	70.0572	5.46599	1.10775	4.9343	Hyper mesic	1.34	N/A
CHN	Wild-caught	85	66.9086	5.64232	1.6952	3.32841	Hyper mesic	1.34	N/A
CHN	Wild-caught	75	59.037	4.48363	1.54834	2.89577	Hyper mesic	1.34	N/A
CHN	Wild-caught	53	41.7195	3.24937	1.44973	2.24136	Hyper mesic	1.34	N/A
CHN	Wild-caught	70	55.1012	4.23174	1.26511	3.34497	Hyper mesic	1.34	N/A
CHN	Wild-caught	51	40.1451	3.04786	1.17699	2.58954	Hyper mesic	1.34	N/A
CHN	Wild-caught	57	44.8681	2.31738	1.76653	1.31182	Hyper mesic	1.34	N/A
CHN	Wild-caught	71	55.8883	3.1738	1.70359	1.86301	Hyper mesic	1.34	N/A
